# Supplementary material for: Blood–brain barrier penetrating liposomes with synergistic chemotherapy for glioblastoma treatment
Source: Royal Society of Chemistry journal article supplement (doi:10.1039/d1bm01506k), 2021-11-24
Supplement: d1bm01506k1.pdf [file d1bm01506k1.pdf]

## Electronic Supplementary Information

### Blood-Brain Barrier Penetrating Liposome with Synergistic Chemotherapy for Glioblastoma Treatment

Ying Zhang<sup>a,1</sup>, Haijing Qu<sup>b,1</sup>, Xiangdong Xue<sup>a,b,\*</sup>

<sup>a</sup>Key Laboratory of Resource Biology and Biotechnology in Western China, Ministry of Education,  
College of Life Sciences, Northwest University, Xi'an, 710069, China

<sup>b</sup>School of Pharmacy, Shanghai Jiao Tong University, Shanghai, 200240, China

<sup>1</sup>*Y. Zhang and H. Qu contributed equally to this work*

Corresponding author. E-mail address: xuexd@sjtu.edu.cn (X. Xue).

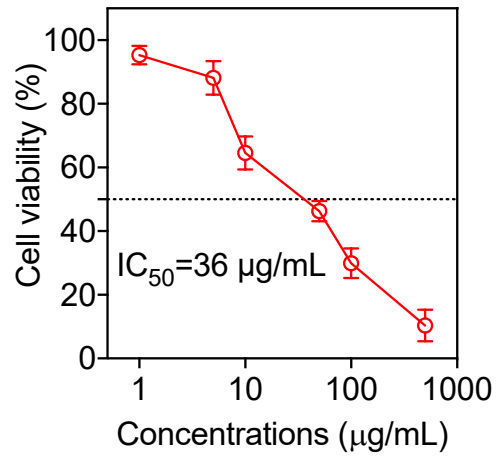

**Figure S1.** Cell viability of GL261 treated with TMZ at different ratios. The cells were incubated with TMZ for 24 h and applied to MTT assay.

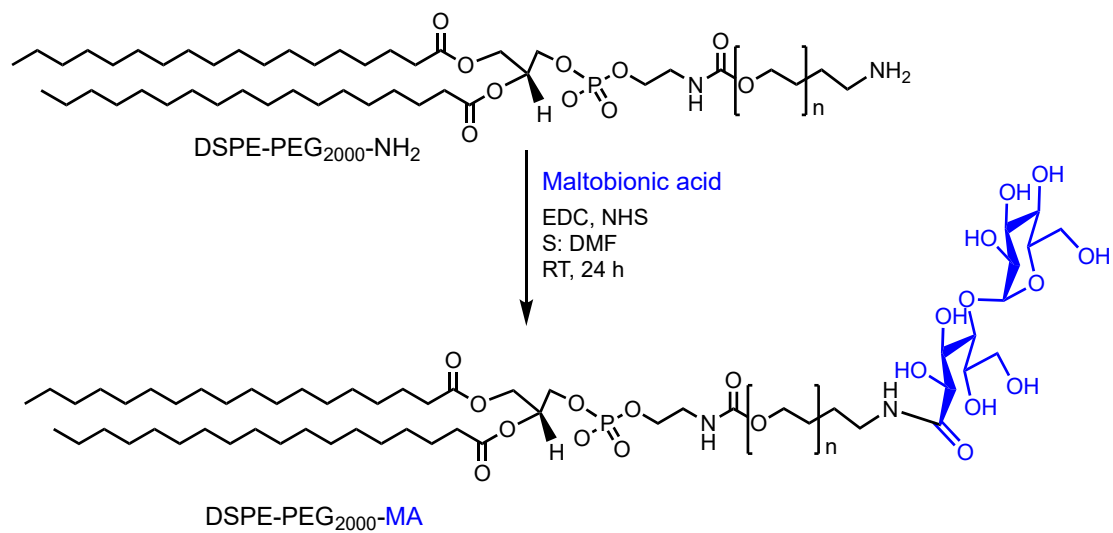

**Figure S2.** Synthesis of DSPE-PEG<sub>2000</sub>-MA.

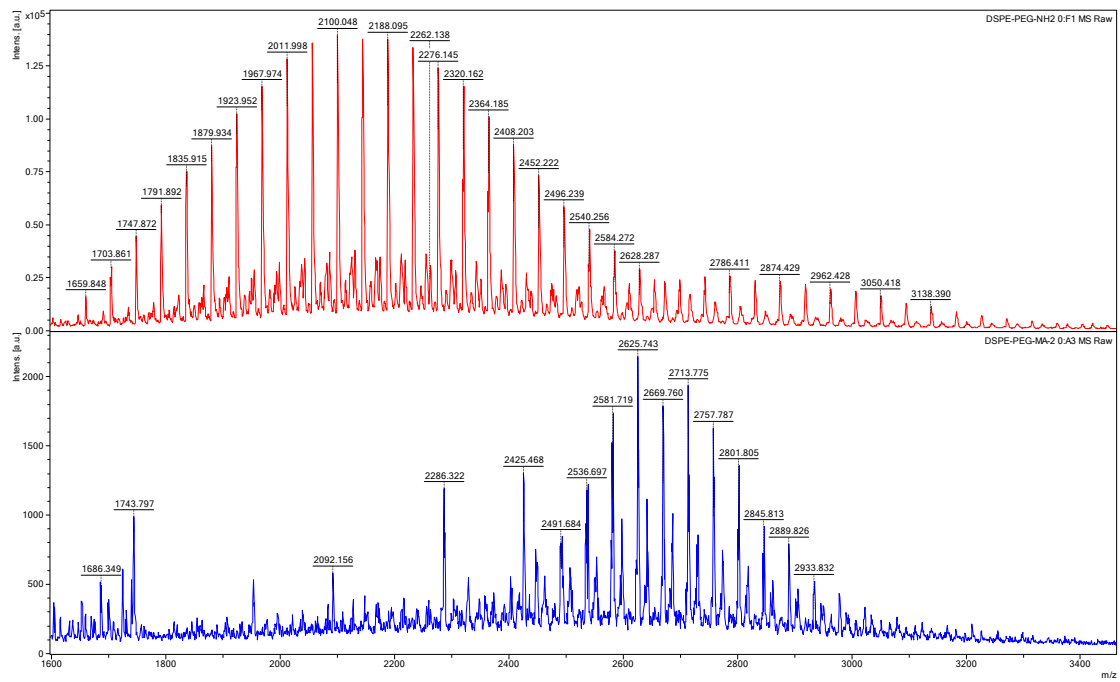

**Figure S3.** The MS spectra showed that the DSPE-PEG<sub>2000</sub>-MA was successfully synthesized.

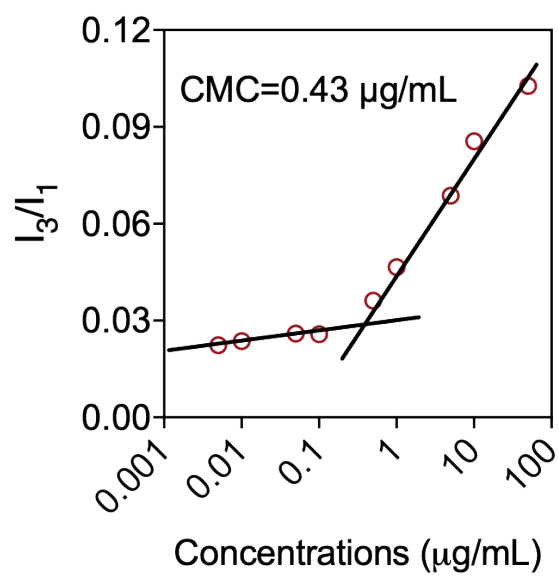

**Figure S4.** The critical micelle concentration (CMC) of gLTP. The concentration was determined by the adding amounts of PC.

**Table S1.** The material profiles of the liposomal formulations.

| <b>Liposomes</b> | <b>D<sub>hyd</sub> (nm)</b> | <b>PDI</b> |
|------------------|-----------------------------|------------|
| LTP              | 131±15                      | 0.203      |
| gLTP             | 133±13                      | 0.246      |
| LR               | 123±9                       | 0.212      |
| gLR              | 126±11                      | 0.189      |
| LMag             | 135±6                       | 0.226      |
| gLMag            | 137±8                       | 0.243      |

D<sub>hyd</sub> is hydrodynamic diameter; PDI denotes polydispersity index.
